# Supplementary material for: Glutamine-assisted synthesis of Cu-doped CeO2 nanowires with an improved low-temperature CO oxidation activity
Source: Royal Society of Chemistry journal article supplement (doi:10.1039/c4ra16556j), 2015-01-01
Supplement: c4ra16556j1.pdf [file c4ra16556j1.pdf]

## Supporting Information for

# **Glutamine-assisted synthesis of Cu-doped CeO<sub>2</sub> nanowires with an improved low-temperature CO oxidation activity**

Juan Wang, Siwen Lin, Zeye Han, Yuping Liu\*

Research Center for Analytical Sciences, College of chemistry, Nankai University, Collaborative Innovation Center of Chemical Science and Engineering (Tianjin), Tianjin 300071, P. R. China.

## **Experimental details**

### **Materials Synthesis**

Cu-doped CeO<sub>2</sub> nanowires were prepared by a facile hydrothermal method. In a typical procedure, solid urea (0.03 mol) was directly added to a mixed solution of CuSO<sub>4</sub>•5H<sub>2</sub>O (9.1mmol), Ce(NO<sub>3</sub>)<sub>2</sub>•3H<sub>2</sub>O (0.91mmol) and glutamine (GLN, 0.01 mol) in distilled water (50 ml). The mixture was vigorously stirred for 15 min and then sealed into a Teflon-lined autoclave. The autoclave was heated to 140 °C and maintained for 12 h, and then cooled to room temperature naturally. The resulting precipitate was separated by centrifugation, washed with distilled water several times, and dried at 60 °C for 12 h. The obtained samples were further calcined in air at 400 °C for 2 h. For comparison, the samples of pure CeO<sub>2</sub> with glutamine and Cu-doped CeO<sub>2</sub> composite without glutamine were also prepared under the same experimental condition. Besides the sample of pure CeO<sub>2</sub> with glutamine, Cu-doped CeO<sub>2</sub> composite without glutamine was also prepared under the same experimental condition to make sure the role of Cu<sup>2+</sup> ions in the formation of nanowires. In addition, the effect of reaction time on the morphologies of glutamine-assisted Cu-doped CeO<sub>2</sub> was investigated.

### **Materials Characterizations**

The crystal phases of the calcined samples were characterized using X-ray powder diffraction (XRD, Rigaku. D/Max  $\Phi$ ) with a graphite monochromatic Cu K $\alpha$  radiation ( $\lambda=0.15418$  nm) at a scanning rate of 4°/min. Inductively coupled plasma-atomic spectroscopy (ICP-AES) analysis was performed on a Profile Spec ICP-AES spectrometer (ICP-900 (N+M) USA Thermo Jarrell-Ash Corp). X-ray photoelectron spectroscopy (XPS) measurement was performed on a Kratos Axis Ultra DLD spectrometer employing a mono-chromated Al-K $\alpha$  X-ray source ( $h\nu = 1486.6$  eV). The Ar<sup>+</sup> bombardment on the CeCu<sub>0.20</sub> nanowires sample was performed with an ion current of  $\sim 100$  mA rastered over an area of  $2 \times 2$  mm<sup>2</sup>. The ion beam had an energy of 3.8 keV and made an angle of 60° with the sample surface. Using the atomic sensitivity factors and Shirley mode for subtraction of the spectral background, Cu/Ce relative atom ratio was automatically achieved by the Vision Processing 2.2.8, where the shakeup contribution to the intensity of the main peak has been also taken into account. The size and morphology of the calcined samples were examined by scanning electron microscopy (SEM, HITACHI S-4800) and transmission electron microscopy (TEM, JEM-2100F). The Brunauer-Emmett-teller (BET) surface area of calcined Cu-doped CeO<sub>2</sub> nanowire sample was tested by Quantachrome NOVA 2000e sorption analyzer.

### **Catalytic tests**

The catalytic activities of Cu-doped CeO<sub>2</sub> nanowires were carried out with 0.2 g in a quartz tube reactor under atmospheric pressure flow of 33.4 mL • min<sup>-1</sup>, with a 1 % CO and fresh air balanced composition from air generator. The reactor outlet stream

was monitored for CO and CO<sub>2</sub> concentration by on-line GC 900A. In order to check the stability of the system, a second run of Cu-doped CeO<sub>2</sub> nanowires for CO oxidation was also carried out under the same condition.

### Supplementary Figures

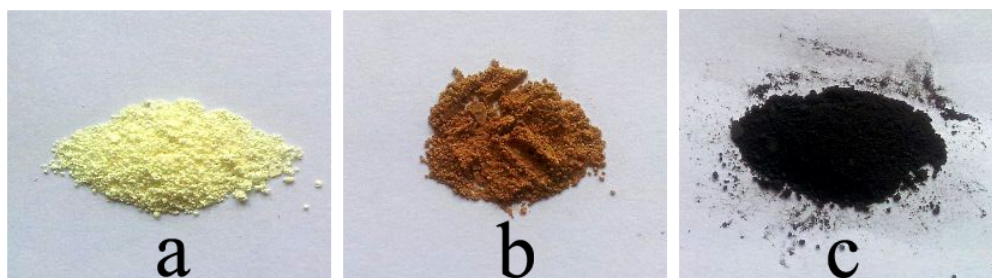

**Fig. S1** Photos of calcined samples as powders.  
(a) pure CeO<sub>2</sub> ; (b) CuCe<sub>0.20</sub> ; (c) CeCu<sub>0.41</sub>

Table 1

Relative atomic content of Cu and Ce of CeCu<sub>0.20</sub> nanowires from XPS depth profiling at different etching times

| Etching time /min | 0     | 2     | 6     | 11    |
|-------------------|-------|-------|-------|-------|
| Atomic content /% |       |       |       |       |
| <b>Cu</b>         | 19.99 | 21.87 | 20.11 | 19.54 |
| <b>Ce</b>         | 80.01 | 78.13 | 79.89 | 80.46 |
